# Supplementary material
Source: publisher figshare collection journal article supplement (https://diabetesjournals.figshare.com/ndownloader/files/30689768)
Supplement: Supplementary file 1 [file 30689768]

| **Supplementary Table S1. Demographic and clinical variables overall and by high versus low scoring READDY respondents** | | | |
| --- | --- | --- | --- |
| **Variable** | **Total sample** | **Any score ≤ 4.0** | **All scores >4.0** |
| **N** | 805 | 322 (40%) | 483 (60%) |
|  | **mean (SD)** | **mean (SD)** | **mean (SD)** |
| Years of age at survey | 17.5 (2.1) | 16.7 (1.85) | 18.0 (2.06) |
| Years since diagnosis | 7.2 (4.8) | 5.63 (4.46) | 8.28 (4.74) |
| Percent time in target glucose range (among subset using CGM) | 41.1 (22.1)  (n=551) | 41.6 (24.4)  (n=220) | 40.8 (20.4)  (n=331) |
| Hemoglobin A1c (%) | 8.8 (2.0) | 8.78 (2.20) | 8.82 (1.88) |
| Hemoglobin A1c (mmol/mol) | 73 (22) | 72 (24) | 73 (21) |
|  | **n (%)** | **n (%)** | **n (%)** |
| Female sex | 400 (49.7) | 167 (51.9) | 233 (48.2) |
| Adolescent age  (15 to 18 years) | 573 (71.2) | 274 (85.1) | 299 (61.9) |
| Private insurance | 612 (76.0) | 221 (68.6) | 391 (81.0) |
| Pump insulin regimen | 449/792 (56.7) | 155/309 (50.2) | 294/483 (60.9) |
